# Supplementary material for: Identification of hub genes in colorectal cancer based on weighted gene co-expression network analysis and clinical data from The Cancer Genome Atlas
Source: Oxford University Press journal article supplement (doi:10.1042/bsr20211280), 2021-07-01

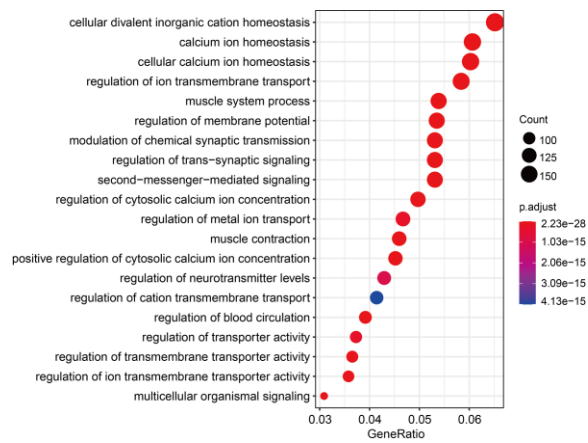

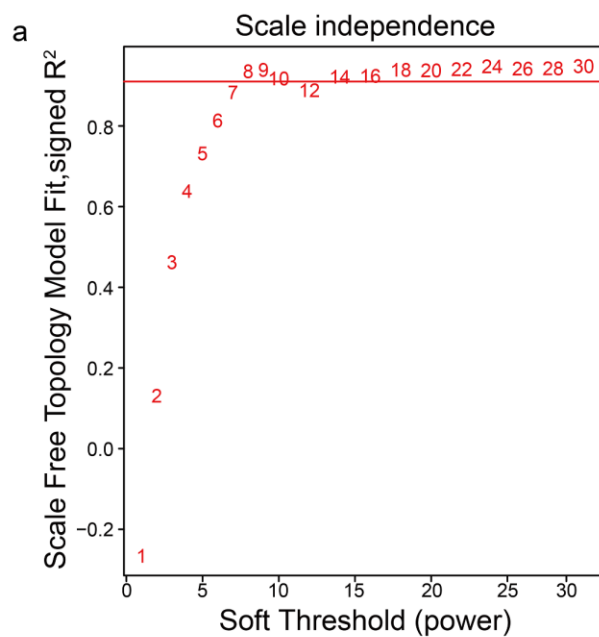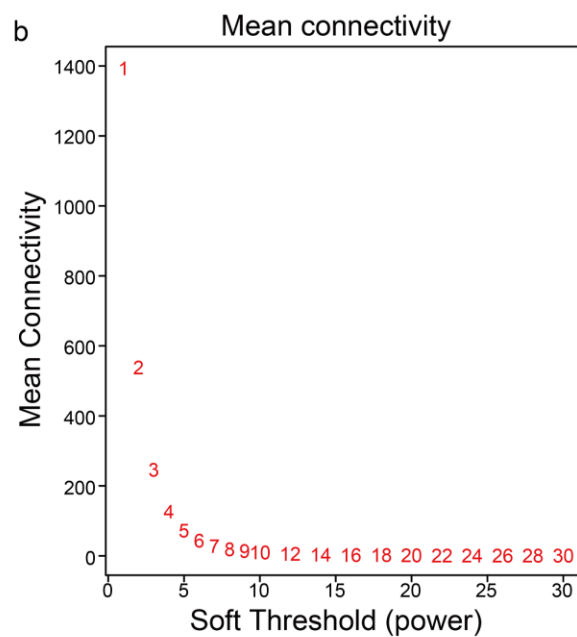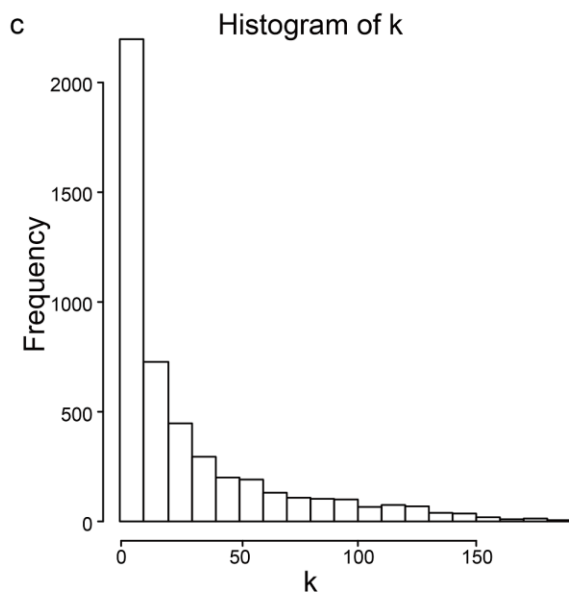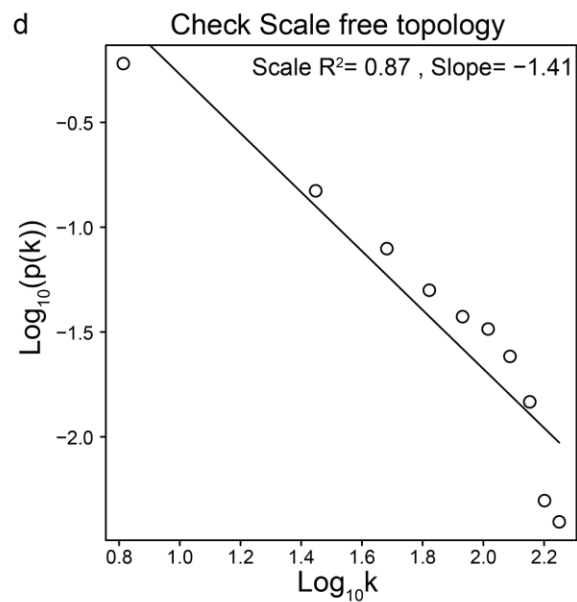

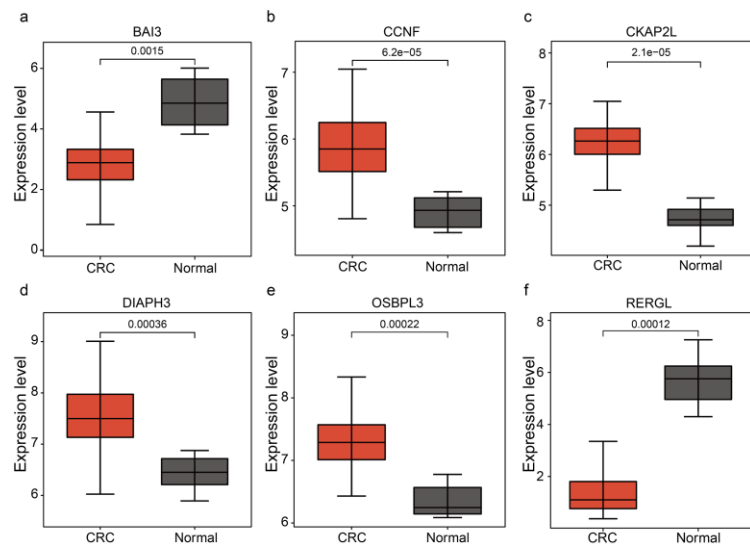

Supplement: bsr-2021-1280_supp.pdf [file bsr-2021-1280_supp.pdf]
